# Supplementary material
Source: PubMed Central journal article supplement (PMC3807423)
Supplement: JVI.01397-13_zjv999098101so1.pdf [file JVI.01397-13_zjv999098101so1.pdf]

## Supplemental Materials

### Supplemental Section I: Construction of a Ribozyme Processing Cassette for Minireplicon Cloning and Analysis of Ribozyme Activity.

To evaluate ribozyme processing and provide a platform for cloning of minireplicon reporters, we engineered the *in vitro* transcription cassette pSYNV<sub>HRz,ΔRz</sub> (Note: See Fig. S1 for an overview of the steps used to construct pSYNV<sub>HRz,ΔRz</sub> and Table S1 for all primers used in Supplemental Section I). The pSYNV<sub>HRz,ΔRz</sub> cassette (Fig. S1B) has a bacteriophage T7 promoter (T7-Pro) inserted upstream of a hammerhead ribozyme (HRz) (1), followed by the SYNV leader ( $\mathcal{L}$ ) sequence (2), the 5' untranslated region (UTR) of the N gene (3), a multi cloning site, the 3' UTR of the SYNV L gene (4), the 162 nt trailer ( $\mathcal{T}$ ) sequence (5) and 89 nt from the  $\Delta$ Rz provided by Dr. Andrew Ball (6, 7).

To assess HRz processing, pSYNV<sub>HRz,ΔRz</sub> DNA (Fig. S2A) was digested with *Bsr*GI and transcribed *in vitro* with T7 polymerase to produce a 293 nt runoff transcript (T) containing the HRz. After 0.5, 1, 2, 3 and 4 hr transcription reactions in the presence of an RNase inhibitor (RNase OUT), aliquots were separated on sequencing gels. The primary runoff precursor transcript (T) was evident as a faint band at each of the transcription time points (Fig. S2B). The samples also contained a processed product RNA (HRz1) and a smaller RNA (HRz) that migrate close to the 235 nt ( $\triangleright$ ) and 56 nt ( $\blacktriangleright$ ) marker RNAs show in lanes P and M, respectively. Notably, both the P and HRz RNAs increased in intensity during reactions, whereas the 293 nt precursor transcript (T) remained relatively constant throughout the transcription reactions. These results suggest that the HRz processed the primary transcripts rapidly.

The 5' processing activities of HRz and the 3' processing of  $\Delta$ Rz were also analyzed by digesting pSYNV<sub>HRz,ΔRz</sub> DNA with *Bam*HI to facilitate runoff transcription of a 583 nt RNA (Rz2) containing both

ribozymes. Three high molecular weight RNAs were evident at the five transcription time periods (Fig. S2C). The larger RNA (Rz2) had a size corresponding to that expected of the unprocessed transcription product containing both ribozymes. A more rapidly migrating intermediate (Rz1) also appeared during the reactions that consisted of a faint but discernible doublet indicative of a mixture of transcripts containing either the HRz or the  $\Delta$ Rz ribozymes. The most rapidly migrating high molecular weight RNA (Rz0) corresponding closely in size to the 430 nt marker RNA ( $\blacktriangleleft$  in lane N) increased during reactions due to processing by both ribozymes. In addition, the intensity of two smaller RNAs corresponding to the expected 63 nt HRz fragment (15 nt *StuI* and 47 nt HRz sequences) and the 89 nt  $\Delta$ Rz product increased throughout the reactions. In sum, the kinetics of the reactions confirmed that both ribozymes were active *in vitro*.

Time course experiments were carried out to characterize ribozyme activities by eluting the unprocessed Rz2 band containing both ribozymes from preparatory acrylamide gels (Fig. S2D). In these experiments, Rz2 recovered from the gels was incubated under  $Mg^{2+}$  concentrations suitable for ribozyme activity, and aliquots recovered after 2 to 200 min reactions were frozen on dry ice. Perusal of the sequencing gels revealed a decline in the intensity of the primary Rz2 transcript as the reactions proceeded, whereas the Rz1 and the Rz0 RNAs increased in intensity. More obvious increases in intensity of the  $\Delta$ Rz and HRz RNAs were also evident during the reactions. Taken together, these results indicate that the primary Rz2 transcript is processed at both the 5' and 3' termini to yield the Rz0 RNA, which is predicted to contain a single nucleotide preceding the 5' terminus of the  $\mathcal{L}$  sequence and the exact 3' terminus of the  $\mathcal{T}$  region.

**Supplemental Section II: Construction of the SYN<sub>V</sub> pSYNV-MR<sub>rsGFP-CAT</sub> minireplicon.**

The pSYNV-MR<sub>rsGFP-CAT</sub> derivative was engineered by substituting reporter genes between the *NheI* and *BsrGI* sites of pSYNV<sub>HRz,ΔRz</sub> in manipulations that preserved the 5' and 3' UTRs and the gene junction sequences (GJ) separating the SYNV N, P and L genes (3, 8, 9). For construction of pSYNV-MR<sub>rsGFP-CAT</sub>, a red-shifted green fluorescent protein (rsGFP) intermediate fragment was amplified from pGD-GFP (10) (See Fig. S3 and Table S2 for details of the cloning steps used for pSYNV-MR<sub>rsGFP-CAT</sub> construction). The gene junction (GJ) sequence separating the SYNV N and P genes (NPJ IF) was then inserted at the 3' end of GFP after amplification of RNA from SYNV-infected plants. Another fragment was engineered to introduce a second reporter, chloramphenicol acetyl transferase (CAT) from a *Barley stripe mosaic virus* (BSMV) gRNA-βbCAT construct described earlier (11) at a position corresponding to the P protein ORF. Then, the two fragments were joined by overlap PCR (12) and introduced between the *NheI* and *BsrGI* sites of pSYNV<sub>HRz,ΔRz</sub> to generate pSYNV<sub>rsGFP-CAT</sub>. (Note: In pSYNV<sub>rsGFP-CAT</sub>, the CAT 3' UTR corresponds to the SYNV L gene 3' UTR). Next, the sequence flanked by the *StuI* and *SacI* sites of pSYNV<sub>rsGFP-CAT</sub> was cloned between the *StuI* and *SacI* sites of the pCass2 vector (13) to yield the derivative pSYNV-Cass<sub>rsGFP-CAT</sub>. This manipulation eliminated the pSYNV<sub>rsGFP-CAT</sub> T7 promoter and positioned the GFP-CAT insert between the pCassRz2 CaMV 35S<sup>2</sup> promoter and the *A. tumefaciens* nopoline synthetase termination signal (*nos*) to facilitate RNA transcription and termination in agroinfiltrated plants. In the final step, a blunt end ligation reaction was implemented to insert the *HaeII* fragment from pSYNV-Cass<sub>rsGFP-CAT</sub> into the *XmnI* and *PmeI* sites of pCAMBIA1300 to create the pSYNV-MR<sub>rsGFP-CAT</sub> reporter cassette (See Fig. S3 for cloning details). The complete sequence from the T-DNA right border to the left border of pSYNV-MR<sub>rsGFP-CAT</sub> has been submitted to GenBank and can be found under the accession number JNO38404.

### **Supplemental Section III: Construction of additional SYNV minireplicon derivatives.**

Four additional minireplicons were generated on the basis of the pSYNV-MR<sub>rsGFP-CAT</sub> scaffold sequence to provide different reporter substitutions in the SYNV N and P ORFs (See Fig. S4 for an overview). The enhanced GFP (eGFP) reporter gene was amplified from pEGFP-N1 (Clontech, Palo Alto, CA), and DsRed (14), was amplified from pGD-DsRed (10). The expression cassettes were divided into 5 fragments, **1)** the leader sequence plus the N gene 5' UTR sequence, **2)** the ORF1 gene, **3)** the N/P junction including the P protein gene 5' UTR, and **4)** the ORF2 gene and **5)** the L gene 3'UTR with the trailer sequence. Each of these fragments were amplified by PCR with the primers listed in Table S3. To join two fragments together, two contiguous primers were phosphorylated with T4 DNA polynucleotide kinase (T4 PNK; New England Biochemical (NEB), Beverly, MA) before PCR fusion of the fragments. The resulting PCR products were ligated by T4 DNA ligase (NEB) and subjected to a second PCR amplification with two flanking primers. After four rounds of PCR, the full-length cassettes were digested with *Xma*I and *Sac*I, and substituted for the rsGFP-CAT sequence in pSYNV-MR<sub>rsGFP-CAT</sub> to produce the pSYNV-MR<sub>eGFP-CAT</sub>, pSYNV-MR<sub>CAT-eGFP</sub>, pSYNV-MR<sub>eGFP-DsRed</sub> and pSYNV-MR<sub>DsRed-eGFP</sub> minireplicons (Fig. S4).

### **Supplemental Section IV: Mutant Minireplicon Derivatives.**

To destroy rHRz activity, a 16 nt deletion preceding the normal HRz  $\mathcal{L}$  sequence cleavage site was constructed in the 5' HRz of pSYNV-MR<sub>eGFP-DsRed</sub> by amplification with the forward GNPRHindIIIIF and reverse Sma1095R primers (See Table S4 for primers used in Section IV). The amplified product was inserted into the *Hind*III/*Xma*I sites of pSYNV-MR<sub>eGFP-DsRed</sub> to assess biological activity of the HRz deficient derivative. To evaluate the importance of the 5'  $\mathcal{L}$  region, an 18 nt deletion in the 144 nt  $\mathcal{L}$

sequence was created by amplifying pSYNV-MR<sub>eGFP-DsRed</sub> with the  $\mathcal{U}18F$  and Sac3143R primers and the mutant fragment was substituted into the *XmaI/SacI* sites of pSYNV-MR<sub>eGFP-DsRed</sub>. An 18 nt deletion of the  $\tau$  sequence was also incorporated into pSYNV-MR<sub>eGFP-DsRed</sub> as described above by amplification with the NPJF and  $\tau18R$  primer pair and the  $\tau18-r$  and LBAscIR primer pair, to produce the intermediate fragments NP- $\tau\Delta18IF$  and  $\tau\Delta18-LBIF$  respectively. These two fragments were joined by overlap PCR using the forward NPJF and reverse LBAscIR primers to yield the final NP-LB product with an 18 nt deletion in the  $\tau$  sequence. This fragment was digested with *ApaI/SacI* restriction enzymes and cloned into the *ApaI/SacI* sites of pSYNV-MR<sub>eGFP-DsRed</sub>.

A.

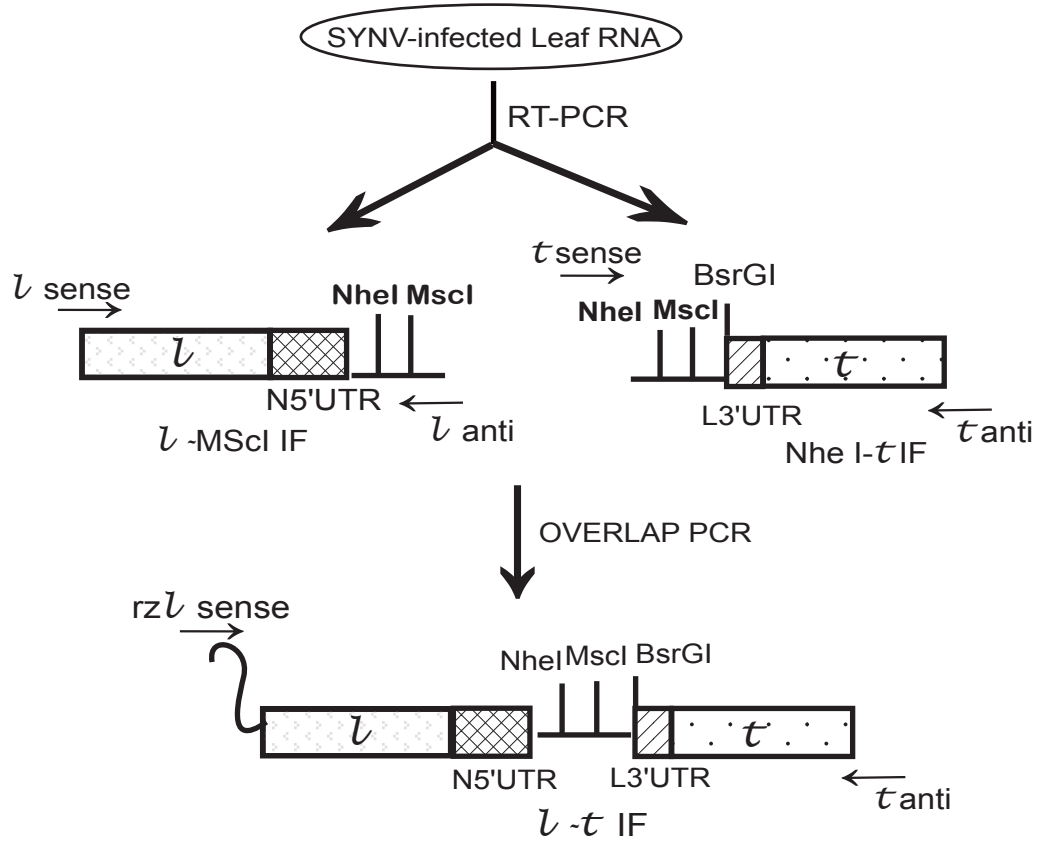

B.

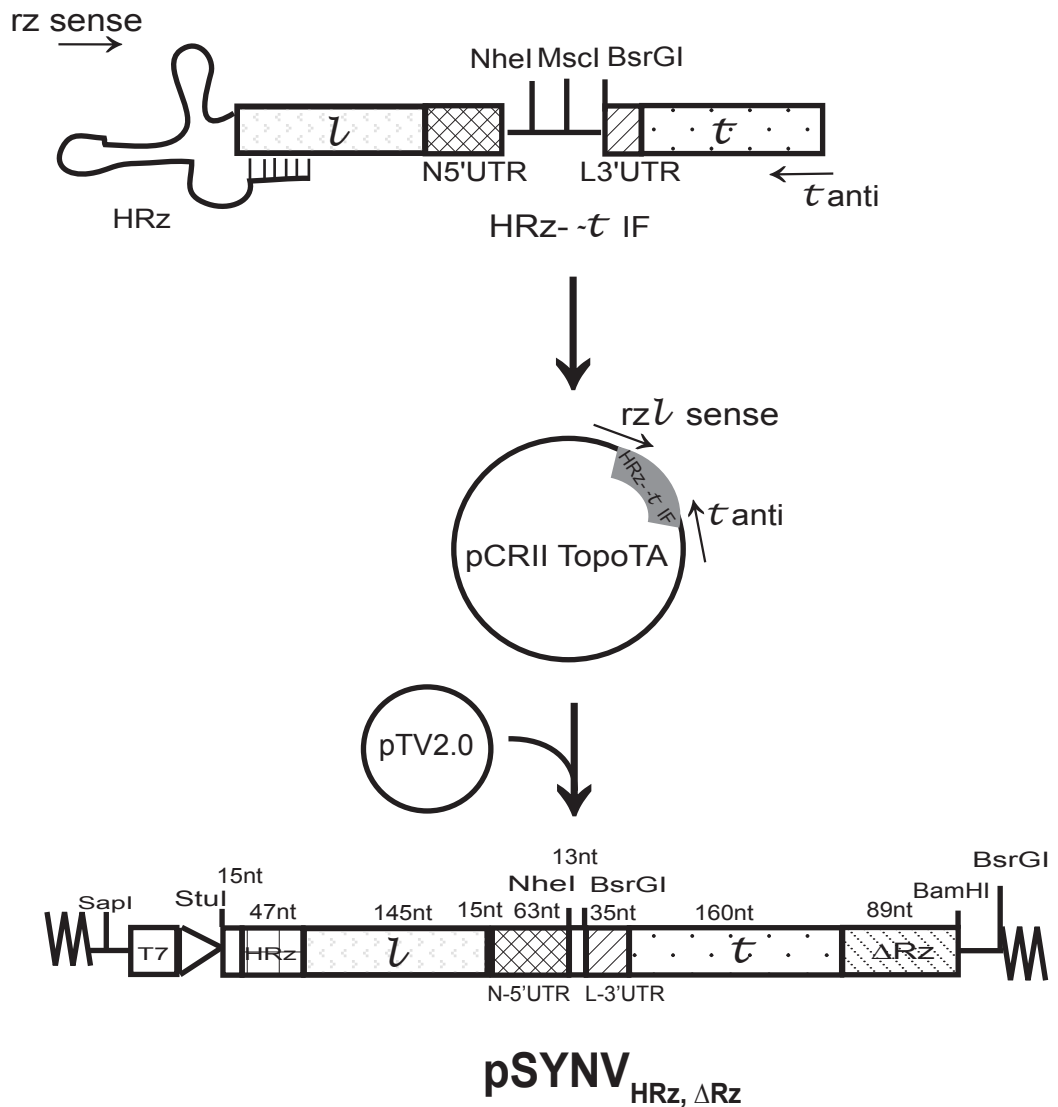

**Figure S1. Construction of pSYNV<sub>HRz,ΔRz</sub> to evaluate hammerhead (HRz) and Hepatitis Delta (ΔRz) ribozyme activity.**

**A)** The SYNV leader ( $\mathcal{l}$ ) sequence through the N protein 5' untranslated region (UTR) was amplified from SYNV infected leaf RNA in an RT-PCR reaction containing the forward  $\mathcal{l}$ sense and reverse  $\mathcal{l}$ anti primers (See Table S1 for all primers used in pSYNV<sub>HRz,ΔRz</sub> cloning) to produce the  $\mathcal{l}$ -MscI intermediate fragment ( $\mathcal{l}$ -MscI IF) which contained the *NheI* and *MscI* sites. A second intermediate (*NheI*- $\mathcal{t}$ IF) was amplified from SYNV RNA with the forward  $\mathcal{t}$ sense and reverse  $\mathcal{t}$ anti primers to produce a fragment containing the *NheI*, *MscI* and *BsrGI* sites fused to a portion of the L protein gene 3' UTR and the SYNV trailer ( $\mathcal{t}$ ) sequence. The two fragments were then fused in an overlap PCR reaction using the  $\mathcal{r}\mathcal{z}\mathcal{l}$  sense and  $\mathcal{t}$ anti primers to generate the  $\mathcal{l}$ - $\mathcal{t}$ intermediate fragment ( $\mathcal{l}$ - $\mathcal{t}$ IF), which contains a portion of the hammerhead ribozyme (HRz) and the internal multicloning site.

**B)** The 5' HRz was completed in a PCR reaction containing the  $\mathcal{r}\mathcal{z}$  sense and  $\mathcal{t}$ anti primers to generate the intermediate fragment HRz- $\mathcal{t}$ , which was introduced into pCRII TopoTA to generate an intermediate plasmid pSM15-15 for use in other experiments. To place HRz- $\mathcal{t}$  under the control of the bacteriophage T7 promoter and introduce the 3' ΔRz, a second amplification was carried out with the  $\mathcal{r}\mathcal{z}\mathcal{l}$  sense and  $\mathcal{t}$  anti primers for insertion into the *StuI* site of the plasmid pTV2.0 to generate the transcription cassette, pSYNV<sub>HRz, ΔRz</sub>. (Note: The cartoons in Figs S1 to 4 are not drawn to scale).

A.

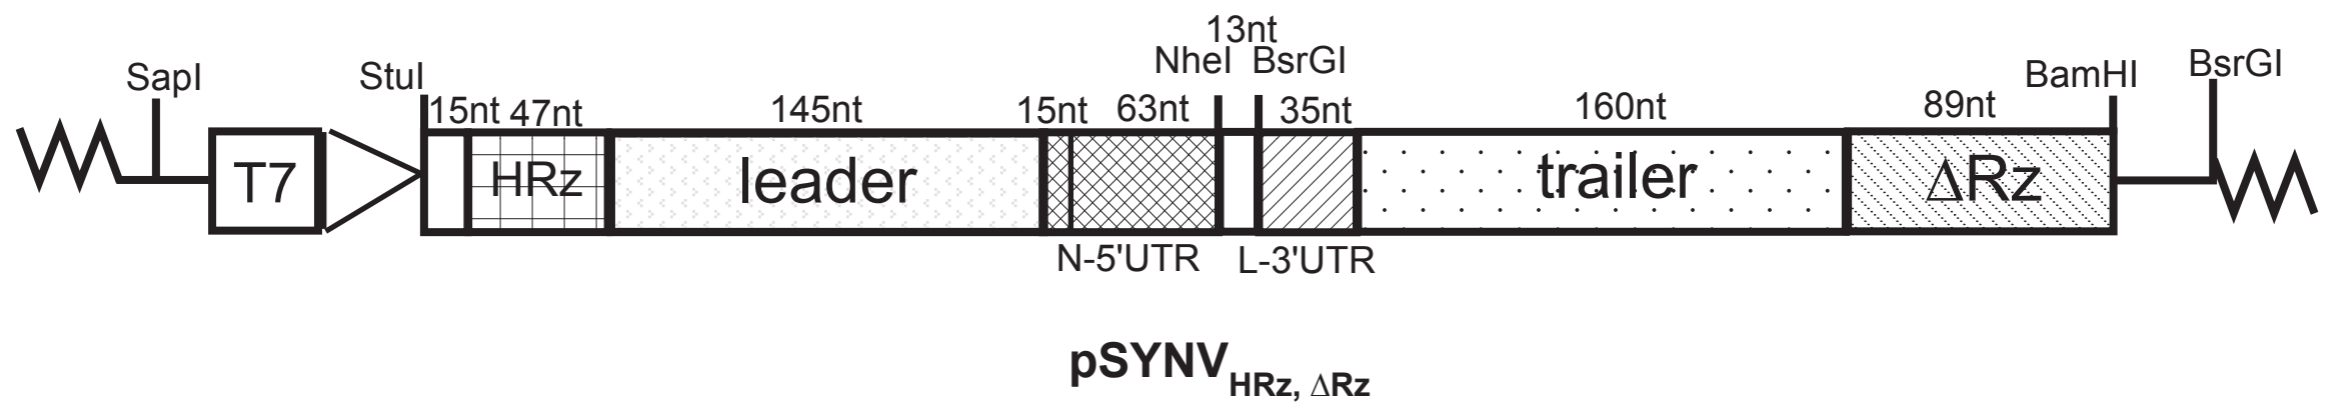

B.

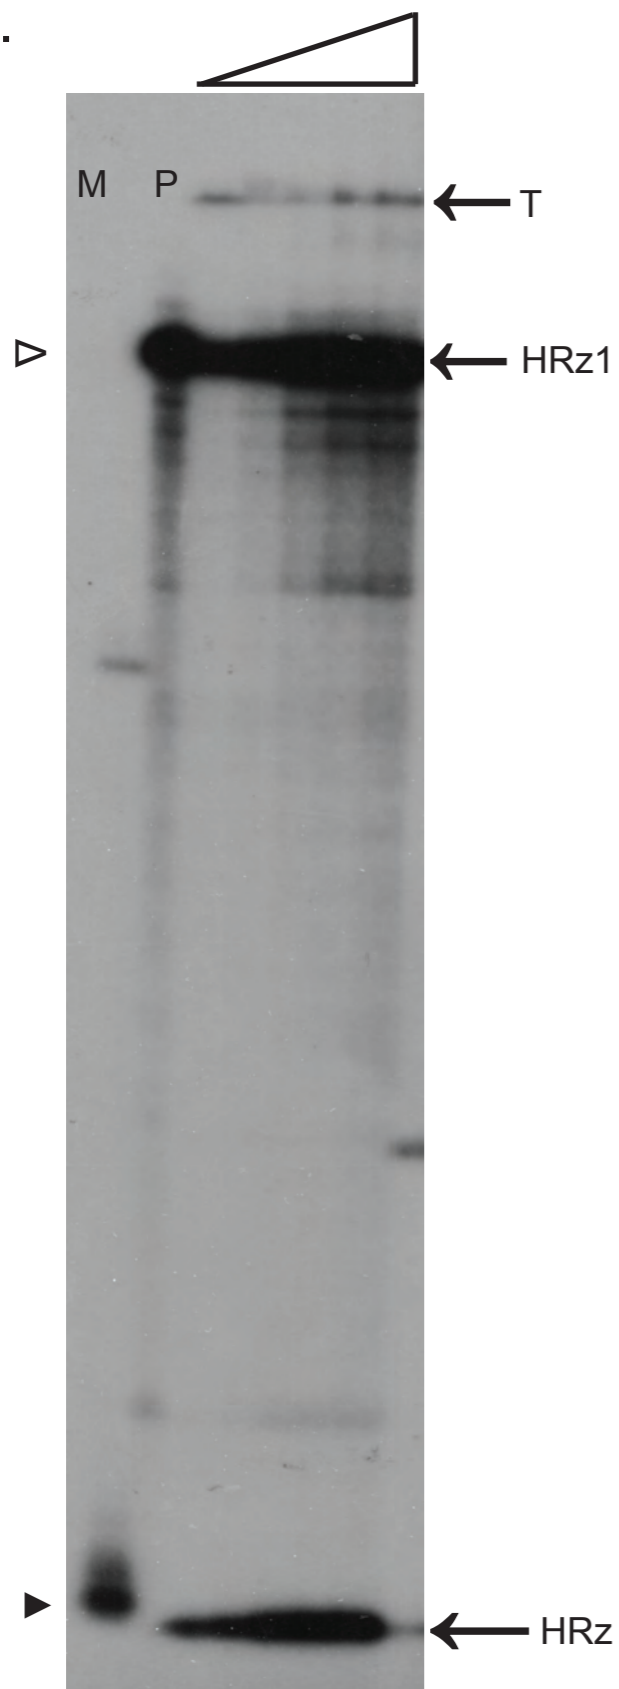

C.

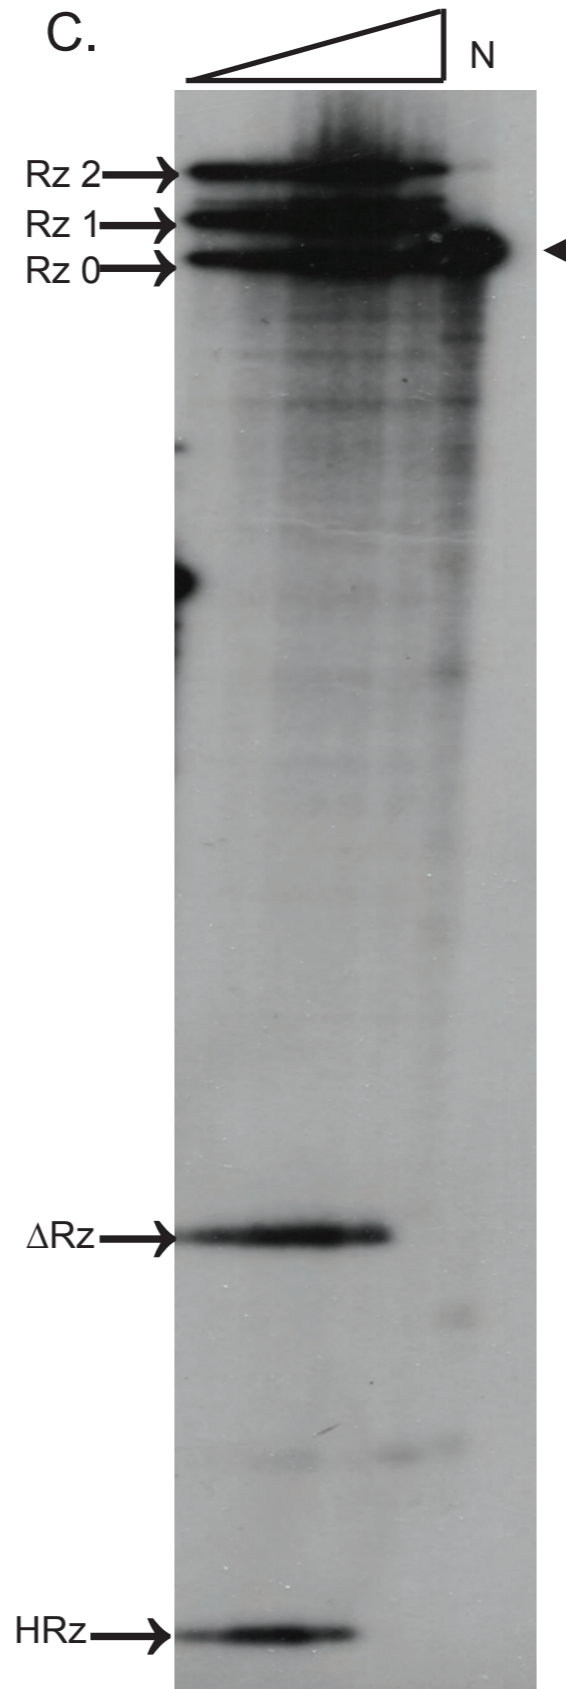

D.

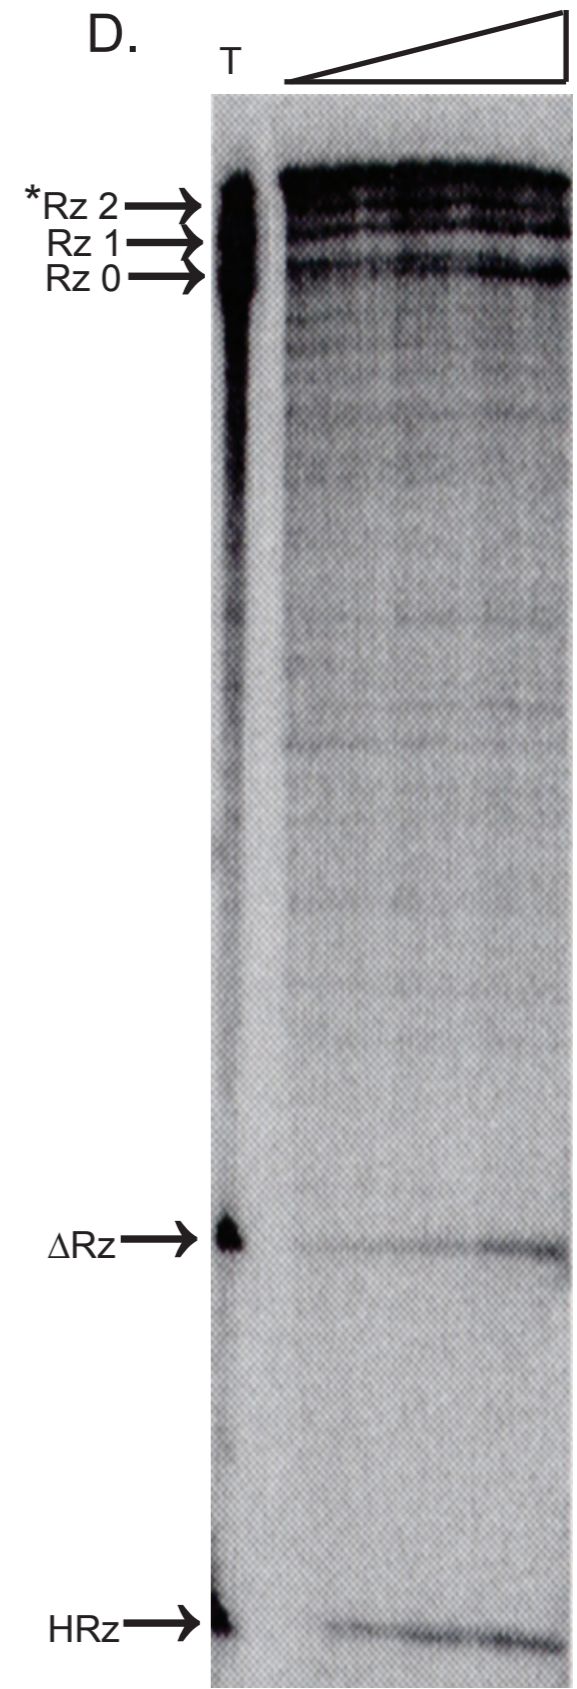



**Figure S2. Hammer head and Hepatitis Delta Ribozyme transcript processing.**

**A) The pSYNV<sub>HRz,ΔRz</sub> cassette.** The pSYNV<sub>HRz,ΔRz</sub> transcription cassette was used to facilitate *in vitro* transcription of SYNV antigenomic (ag) RNAs for evaluation of HRz and ΔRz processing. The sequence downstream of the T7 promoter (T7), consists of a 15 nt *Stu*I restriction site fused to a 47 nt HRz designed to cleave the agRNA transcript one nucleotide (nt) before the 5' terminus of the 145 nt leader ( $\mathcal{L}$ ) sequence. The  $\mathcal{L}$  sequence is followed by a conserved 15 nt gene junction sequence (Vertical line) corresponding to that present in SYNV agRNAs and the 63 nt untranslated region (N-5' UTR) of the N gene mRNA. The N-5' UTR region is located adjacent to a 13 nt multiple cloning site (MCS) containing three unique restriction enzymes, including *Bsr*GI. The MCS is followed by a sequence consisting of the 35 nt 3' untranslated region of the L gene (L-3' UTR), the 160 nt SYNV trailer ( $\mathcal{T}$ ) sequence and an 89 nt ΔRz positioned to process transcripts at the immediate 3' terminus of the  $\mathcal{T}$  sequence. A *Bam*HI restriction site flanks the 3' end of the ΔRz sequence. The 5' *Stu*I and 3' *Bam*HI sites, respectively, were designed to facilitate minireplicon cloning and transfer of the cassette into the other plasmid backgrounds.

**B) Analysis of HRz processing *in vitro*.** The sequencing gel shows the processing of a 293 nt precursor transcript (T) containing only the HRz that was produced by T7 transcription of pSYNV<sub>HRz,ΔRz</sub> plasmid DNA that had been digested with *Bsr*GI in the MCS. Transcription reactions were carried out for two hours at 37°C in the presence of <sup>32</sup>P-UTP in reactions containing 11 mM MgCl<sub>2</sub>. The reactants were then incubated at 25 °C for time periods ranging from 0.5 to 4 hr, frozen on dry ice and separated in 5% polyacrylamide denaturing gels. **Lane M:** 56 nt marker RNA (▶); **Lane P:** ~235 nt marker RNA (▷). The triangle above the lanes shows the 0.5, 1, 2, 3 and 4 hr reaction products. T = migration of the 293 nt HRz precursor transcript from the *Bsr*GI digested plasmid. HRz1 = migration of the 231 nt HRz product.

**C) HRz and ΔRz *in vitro* processing.** Processing of a transcript derived from *Bam*HI digested DNA that contains both the HRz and the ΔRz. **Lane N:** 430 nt Marker RNA lacking both the HRz

and  $\Delta$ Rz ( $\blacktriangleleft$ );  $\Delta$ Rz and HRz = residual ribozyme products; Rz2 = 583 nt primary transcript that contains both HRz and  $\Delta$ Rz. Rz1 = processed product mixture forming a doublet bands, the upper of which contains the  $\Delta$ Rz and the lower containing the HRz; Rz0 = Transcript produced by both  $\Delta$ Rz and HRz cleavage. The triangle above the lane in as is panel B.

**D) HRz and  $\Delta$ Rz processing kinetics.** Analysis of ribozyme processing of the 583 nt RNA transcription product from *Bam*HI digested pSYNV<sub>HRz, $\Delta$ Rz</sub> DNA. The RNA was separated in preparatory acrylamide gels in buffer containing EDTA and a ribonuclease inhibitor (RNase Out) and eluted before ribozyme reactions. The triangle represents lanes loaded with aliquots recovered after 2, 5, 10, 20, 40, 60, 120, 180, and 200 min reactions at 37 °C in a MgCl<sub>2</sub> containing buffer. **Lane T** = Marker reaction products before preparatory acrylamide gel separation. Designations are as indicated in Fig. S1B and C.

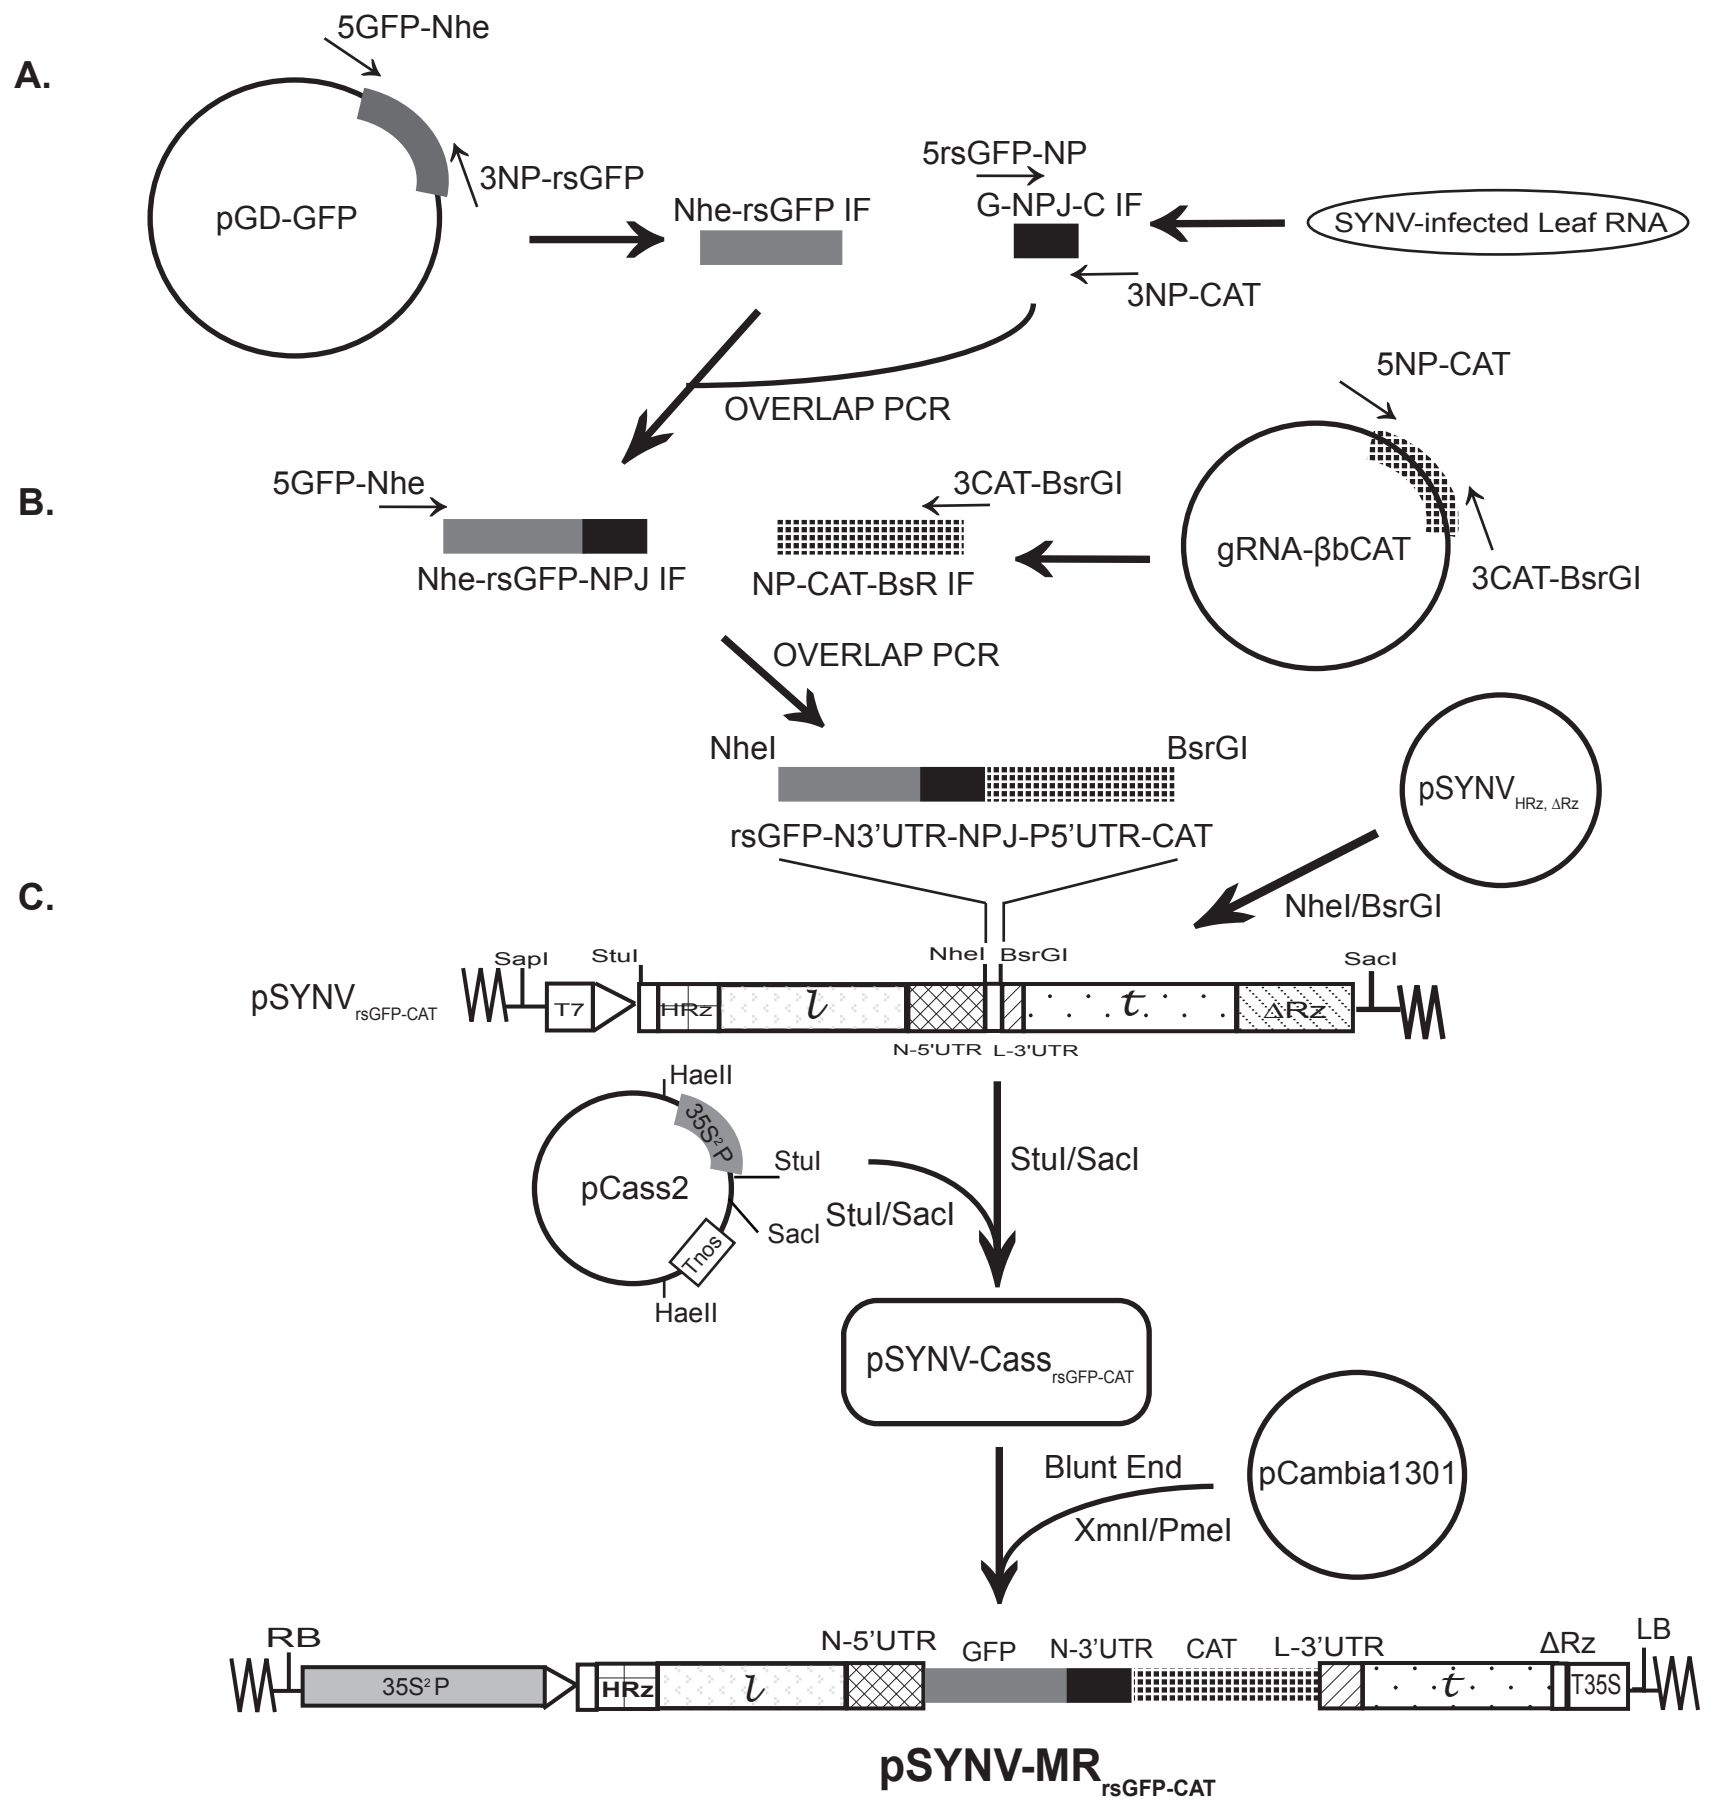

**Figure S3. Engineering the pSYNV-MR<sub>rsGFP-CAT</sub> plasmid.**

**A)** The Nhe-rsGFP intermediate fragment (IF) was constructed by using the forward 5GFP-Nhe and reverse 3NP-rsGFP primers (See Table S2) to amplify rsGFP from pGD-GFP (10). In another reaction, the N protein gene junction sequence was amplified from SYNV-infected plant RNA in a reverse transcription reaction using the primers 5rsGFP-NP and 3NP-CAT to produce the G-NPJ-C IF. Then, the rsGFP and G-NPJ-C IF derivatives were fused in an overlap PCR reaction containing the 5GFP-Nhe and 3NP-CAT primers to create Nhe-rsGFP-NPJ IF.

**B)** The *Barley stripe mosaic virus* plasmid, gRNA- $\beta$ bCAT (11) was used as a source for PCR amplification of NP-CAT-BsR IF with the primers 5NP-CAT and 3CAT-BsR. This PCR product was then fused with Nhe-rsGFP-NPJ IF in an overlap PCR reaction with the 5GFP-Nhe and 3CAT-BsR primers to produce rsGFP-N3'UTR-NPJ-P5'UTR-CAT.

**C)** The rsGFP-N3'UTR-NPJ-P5'UTR-CAT fragment was inserted between the *NheI* and *BsrGI* sites of pSYNV<sub>HRZ- $\Delta$ RZ</sub> to generate pSYNV<sub>rsGFP-CAT</sub>. Then, pSYNV<sub>rsGFP-CAT</sub> was digested with *StuI* and *SacI* and inserted between the *StuI* and *SacI* sites of the pCass2 vector to introduce the CaMV 35S<sup>2</sup> promoter and a 3' flanking *A. tumefaciens nos* termination signal to create pSYNV-Cass<sub>rsGFP-CAT</sub>. As a final step, pSYNV-Cass<sub>rsGFP-CAT</sub> was digested with *HaeII* and the resulting fragment was inserted by a blunt end ligation between the *XmnI* and *PmeI* sites of pCambria1301 to create the pSYNV-MR<sub>rsGFP-CAT</sub> reporter cassette for use in agroinfiltration. Note: For pSYNV-MR<sub>rsGFP-CAT</sub> and other plasmids in Fig. S4 the CAT 3' UTR corresponds to the SYNV L gene 3' UTR rather than the P gene 3' UTR.

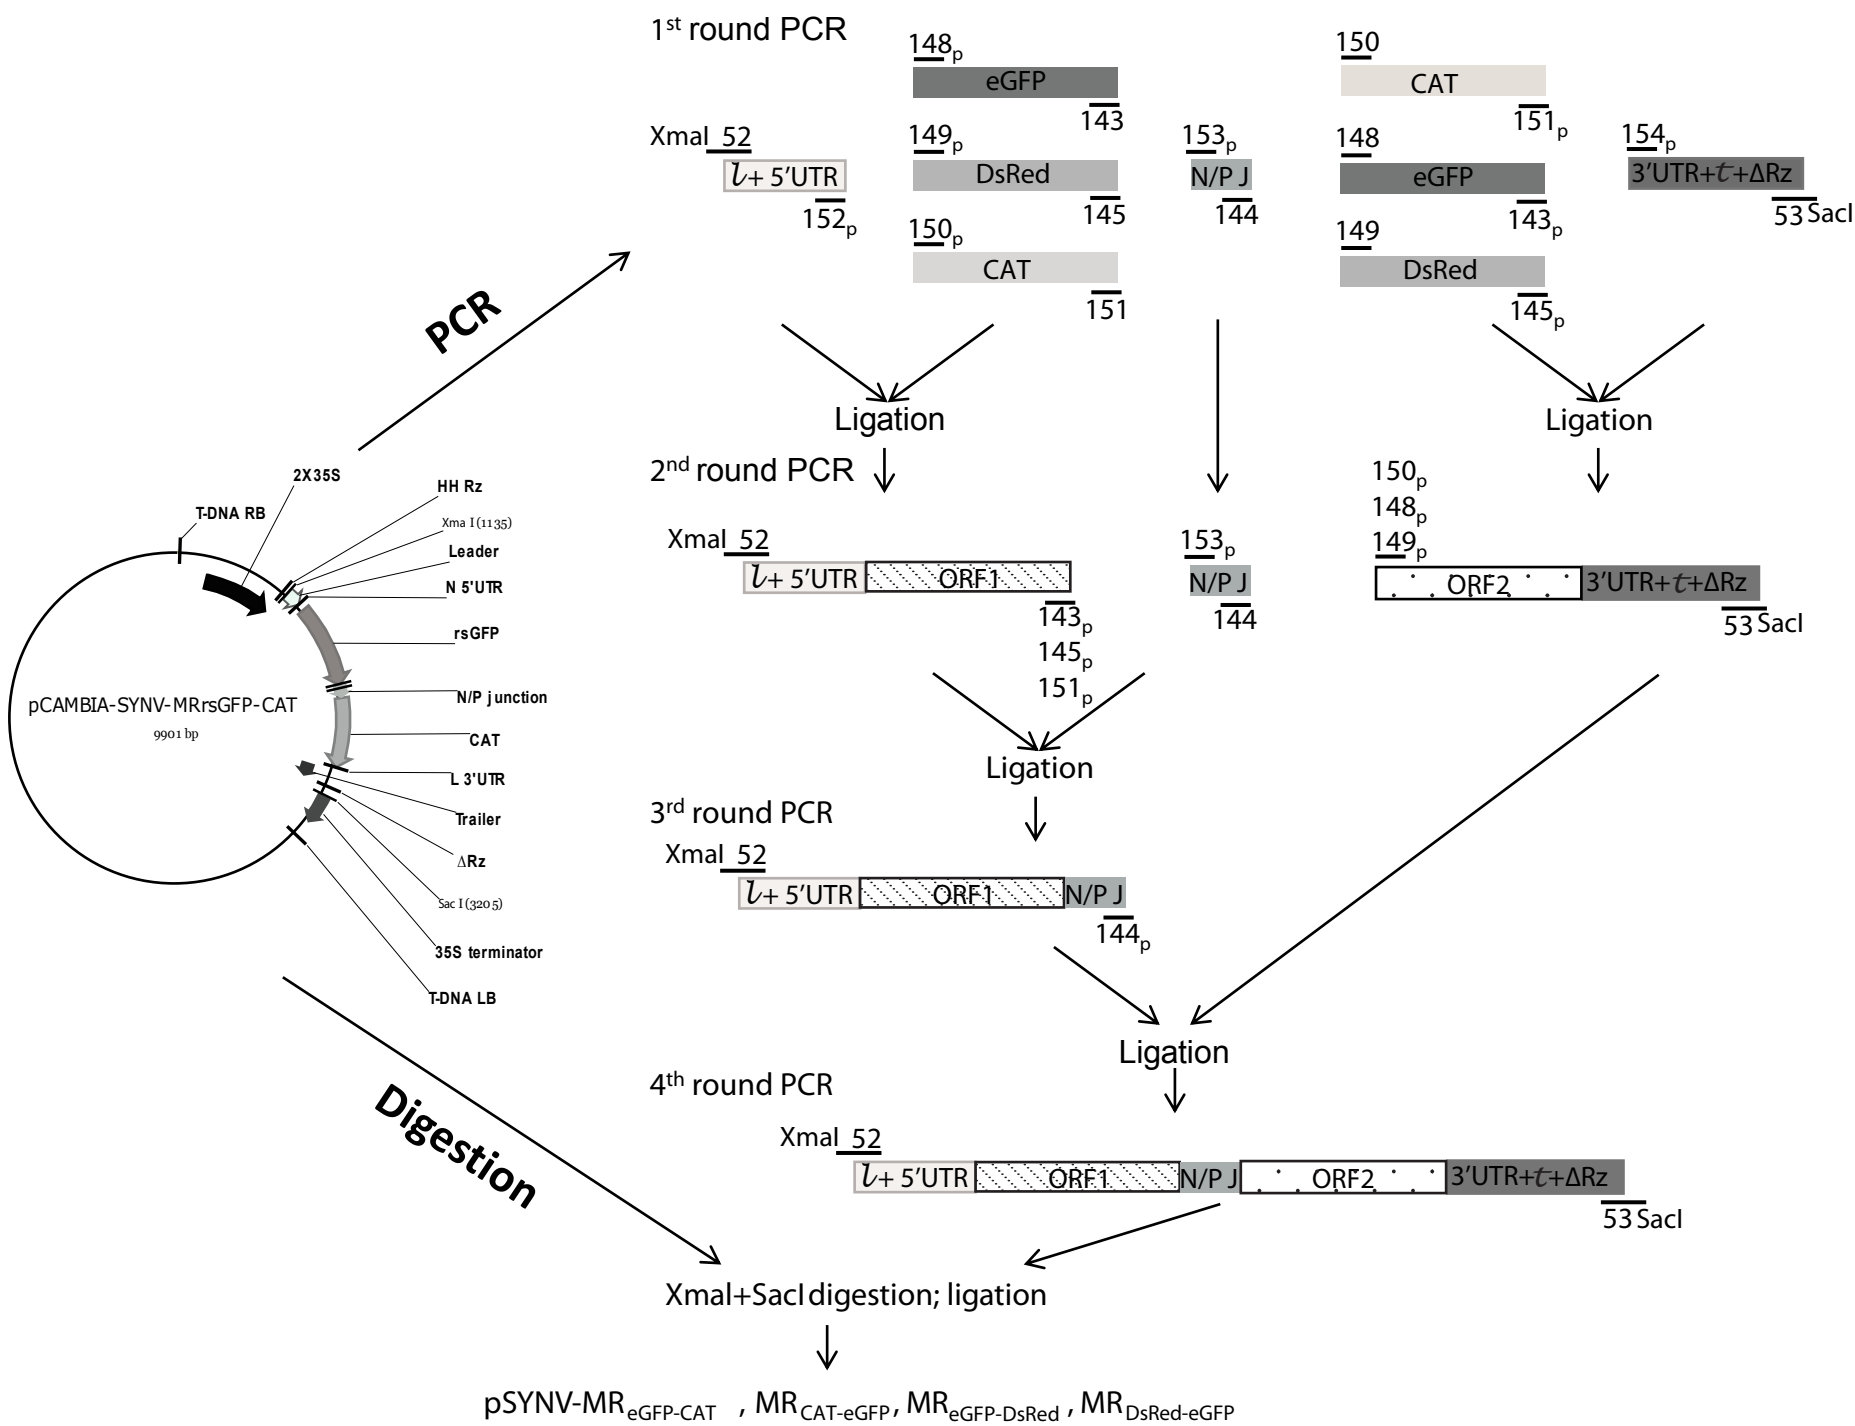

**Figure S4. Construction of the pSYNV-MR<sub>eGFP-CAT</sub>, pSYNV-MR<sub>CAT-eGFP</sub>, pSYNV-MR<sub>eGFP-DsRed</sub> and pSYNV-MR<sub>DsRed-eGFP</sub> plasmids.**

In a series of first round PCR reactions, reporter genes and regulatory sequences from pSYNV-MR<sub>rsGFP-CAT</sub> were amplified by PCR with primers shown on top of each fragment. The contiguous primers (as indicated by subscript <sub>p</sub>) were phosphorylated with T4 PNK to facilitate ligation. The joined PCR products were amplified with their flanking primers (See Table S3). In a final series of substitution reactions, the reporter expression cassettes and pSYNV-MR<sub>rsGFP-CAT</sub> were digested with *Xma*I and *Sac*I, and then ligated to create the pSYNV-MR<sub>eGFP-CAT</sub>, pSYNV-MR<sub>CAT-eGFP</sub>, pSYNV-MR<sub>eGFP-DsRed</sub> and pSYNV-MR<sub>DsRed-eGFP</sub> plasmids.

**Table S1. Primers for creation of the pSYNV<sub>HRz, ΔRz</sub> transcription cassette and SYNV L gene cloning.**

| Clone Name                     |   | Primer Name      | Primer sequence                                 | Purpose                                                                                                                                                 |
|--------------------------------|---|------------------|-------------------------------------------------|---------------------------------------------------------------------------------------------------------------------------------------------------------|
| <b>pSYNV<sub>HRz, Rz</sub></b> |   |                  |                                                 |                                                                                                                                                         |
| <i>l</i> -MScI IF              | F | <i>l</i> sense   | AGAGACAGAAACTCAGAAAATACAATCACCG                 | To amplify the SYNV leader sequence through the N5'UTR sequence.                                                                                        |
|                                | R | <i>l</i> anti    | GTATTTTAATTGCAGGTAATCGCTAGCTGGCCA               |                                                                                                                                                         |
| Nhe I- <i>t</i> IF             | F | <i>t</i> sense   | ATCGCTAGCTGGCCATGTACATCTATATCTCTTGAA            | To amplify sequence from the <i>Bsr</i> GI site at the 3' end of the SYNV L gene through the end of the genomic RNA.                                    |
|                                | R | <i>t</i> anti    | GGTATAGGGATTGTTCTGAGCTTTTGTCTCT                 |                                                                                                                                                         |
| <i>l</i> - <i>t</i> IF         | F | <i>rzl</i> sense | CCCGGTATCCCGGGTTCAGAGACAGAAACTCAGAA             | To generate a product extending from 8 bases before the 5' side of the <i>Sma</i> I site in the Hammerhead ribozyme to the end of the SYNV genomic RNA. |
|                                | R | <i>t</i> anti    | GGTATAGGGATTGTTCTGAGCTTTTGTCTCT                 |                                                                                                                                                         |
| HRz- <i>t</i> IF               | F | <i>rz</i> sense  | GTCTCTCTGATGAGGCCGAAAGGCCGAAAACCCGGTATCCCGGGTTC | To attach the remainder of the hammerhead ribozyme to the transcription cassette.                                                                       |
|                                | R | <i>t</i> anti    | GGTATAGGGATTGTTCTGAGCTTTTGTCTCT                 |                                                                                                                                                         |
| <b>L gene cloning</b>          |   |                  |                                                 |                                                                                                                                                         |
|                                | F | L-sense          | GTCGACATGGAAGGGATGGATCACTGG                     | To amplify the SYNV L gene.                                                                                                                             |
|                                | R | L-anti           | GTCGACTTATACTTCAAGAGATATAGATG                   |                                                                                                                                                         |

**Table S2. Primers used for cloning SYNV minireplicon pSYNV-MR<sub>rsGFP-CAT</sub>**

| Clone Name                  |   | Primer Name | Primer sequence                               | Purpose                                                                                                 |
|-----------------------------|---|-------------|-----------------------------------------------|---------------------------------------------------------------------------------------------------------|
| Nhe-rsGFP IF                | F | 5GFP-Nhe    | GCTAGCATGGGTAAAGGAGAAGAAC                     | To introduce rsGFP into pSYNV <sub>HRz,Rz</sub> .                                                       |
|                             | R | 3NP-rsGFP   | GTAGAGTTGTGGCTGTAGTTTATCTAGATCCGGTGGAT        |                                                                                                         |
| G-NPJ-C IF                  | F | 5rsGFP-NP   | ATCCACCGGATCTAGATAAACTACAGCCACAACCTCTACC      | To amplify the NPJ sequence having an overlap sequence with rsGFP at 5' end and CAT gene at the 3' end. |
|                             | R | 3NP-CAT     | TCCAGTGATTTTTTTCTCCATGGCCTAGACAAATAATACAAACAG |                                                                                                         |
| Nhe-rsGFP-NPJ IF            | F | 5GFP-Nhe    | GCTAGCATGGGTAAAGGAGAAGAAC                     | To introduce NPJ at the 3' end of the rsGFP gene.                                                       |
|                             | R | 3NP-CAT     | TCCAGTGATTTTTTTCTCCATGGCCTAGACAAATAATACAAACAG |                                                                                                         |
| NP-CAT-BsR IF               | F | 5NP-CAT     | CTGTTTGTATTATTTGTCTAGGCCATGGAGAAAAAAATCACTGGA | To fuse NPJ to the 5' end of the CAT gene.                                                              |
|                             | R | 3CAT-BsrGI  | TGTACATTACGCCCCGCCTGCCA                       |                                                                                                         |
| rsGFP-N3'UTR-NPJ-P5'UTR-CAT | F | 5GFP-NheI   | GCTAGCATGGGTAAAGGAGAAGAAC                     | To introduce the CAT gene into pSYNV <sub>HRz,Rz</sub> .                                                |
|                             | R | CAT-BsrGI   | TGTACATTACGCCCCGCCTGCCA                       |                                                                                                         |



**Table S3. Primers used for cloning, the pSYNV-MR<sub>eGFP-CAT</sub>, MR<sub>CAT-eGFP</sub>, MR<sub>DsRed-eGFP</sub> and MR<sub>CAT-eGFP</sub> minireplicons.**

| No. | Sense | Target Annealed    | Primer Sequence                  |
|-----|-------|--------------------|----------------------------------|
| 52  | F     | SYNV $\mathcal{L}$ | CAGCGGATCCAGGCCTGGATCTTCCCGTCTC  |
| 152 | F     | SYNV 5' UTR        | GCTAGCGATTACCTGCAATTA            |
| 53  | R     | HDV <sub>tz</sub>  | GACGCTCGAGGAGCTCTCCCTTAGCCATCCGA |
| 153 | F     | SYNV NP junction   | TAAACTACAGCCACAACCTCTACCT        |
| 144 | R     | SYNV NP junction   | GGCCTAGACAAATAATACAAACAGACAAAT   |
| 146 | F     | SYNV L 3'UTR       | GAAAAACCTTCCGTTATACACAAGCAG      |
| 154 | R     | SYNV 3'UTR         | TGTACATCTATATCTCTTGAAG           |
| 148 | F     | eGFP               | ATGGTGAGCAAGGGCGAGGA             |
| 143 | R     | eGFP               | TTACTTGTACAGCTCGTCCATGCCGA       |
| 149 | F     | DsRed              | ATGGCCTCCTCCGAGAACGT             |
| 145 | R     | DsRed              | TTATAGGAACAGGTGGTGGCGGCCCT       |
| 150 | F     | CAT                | ATGGAGAAAAAATCACTGGAT            |
| 151 | R     | CAT                | TTACGCCCCGCCCTGCCACTCATCGCAGTACT |

**Table S4. List of primers designed to introduce cis-acting mutations into the SYN<sub>V</sub> minireplicon.**

| Clone Name                |   | Primer Name          | Primer sequence                                         | Purpose                                                                                                      |
|---------------------------|---|----------------------|---------------------------------------------------------|--------------------------------------------------------------------------------------------------------------|
| $\Delta$ HRz              | F | GNPRHindIIIF         | CCATGATTACGCCAAGCTTGCATGCC                              | To inactivate the hammerhead ribozyme from the minireplicons.                                                |
|                           | R | Sma1095R             | GACCCCGGGTACCAAGATCCAGGCCTCTCCAAA<br>TGAAATG            |                                                                                                              |
| $\mathcal{L}_{\Delta 18}$ | F | $\mathcal{L}_{18}$ F | GAAAACCCGGTATCCCGGGTTCAATACAATCAC<br>CGTAGATTAACAG      | To delete 18 nt from the leader sequence.                                                                    |
|                           | R | Sac3143R             | TTCGAGCTCTCCCTTAGCCATCCG                                |                                                                                                              |
| NP- $\tau_{\Delta 18}$ IF | F | NPJF                 | ACTACAGCCACAACCTCTACC                                   | To introduce an 18 nt deletion in the trailer region and create a 5' overlap with NPJ.                       |
|                           | R | $\tau_{18}$ R        | GGAGGTGGAGATGCCATGCCGACCCCAATCCCT<br>ATACCCCATTTATCAT   |                                                                                                              |
| $\tau_{\Delta 18}$ -LB IF | F | $\tau_{18}$ R-r      | GATGATAAATGGGGTATAGGGATTGGGGTTCGG<br>CATGGCATCTCCACCTCC | To introduce an 18 nt deletion in the trailer region and create a 3' overlap with the left border of the MR. |
|                           | R | LBAscIR              | GGGGCGCGCCTGGCAGGATATATTGTGGTGTA<br>ACAAATTGACG         |                                                                                                              |
| NP-LB                     | F | NPJF                 | ACTACAGCCACAACCTCTACC                                   | To join the NP- $\tau_{\Delta 18}$ IF and $\tau_{\Delta 18}$ -LB IF by overlap PCR                           |
|                           | R | LBAscIR              | GGGGCGCGCCTGGCAGGATATATTGTGGTGTA<br>ACAAATTGACG         |                                                                                                              |

### Supplemental References

1. **Herold J, Andino R.** 2000. Poliovirus requires a precise 5' end for efficient positive-strand RNA synthesis. *J. Virol.* **74**:6394-6400.
2. **Zuidema D, Heaton LA, Hanau R, Jackson AO.** 1986. Detection and sequence of plus-strand leader RNA of sonchus yellow net virus, a plant rhabdovirus. *Proc. Natl. Acad. Sci. U.S.A.* **83**:5019-5023.
3. **Zuidema D, Heaton LA, Jackson AO.** 1987. Structure of the nucleocapsid protein gene of sonchus yellow net virus. *Virology* **159**:373-380.
4. **Choi TJ, Kuwata S, Koonin EV, Heaton LA, Jackson AO.** 1992. Structure of the L (polymerase) protein gene of sonchus yellow net virus. *Virology* **189**:31-39.
5. **Choi TJ, Wagner JD, Jackson AO.** 1994. Sequence analysis of the trailer region of sonchus yellow net virus genomic RNA. *Virology* **202**:33-40.
6. **Perrotta AT, Been MD.** 1990. The self-cleaving domain from the genomic RNA of hepatitis delta virus: sequence requirements and the effects of denaturant. *Nucleic Acids Res.* **18**:6821-6827.
7. **Pattnaik AK, Ball LA, LeGrone AW, Wertz GW.** 1992. Infectious defective interfering particles of VSV from transcripts of a cDNA clone. *Cell* **69**:1011-1020.
8. **Heaton LA, Zuidema D, Jackson AO.** 1987. Structure of the M2 protein gene of sonchus yellow net virus. *Virology* **161**:234-241.

9. **Heaton LA, Hillman BI, Hunter BG, Zuidema D, Jackson AO.** 1989. Physical map of the genome of sonchus yellow net virus, a plant rhabdovirus with six genes and conserved gene junction sequences. *Proc. Natl. Acad. Sci. U.S.A.* **86**:8665-8668.
10. **Goodin MM, Dietzgen RG, Schichnes D, Ruzin S, Jackson AO.** 2002. pGD vectors: versatile tools for the expression of green and red fluorescent protein fusions in agroinfiltrated plant leaves. *Plant J.* **31**:375-383.
11. **Zhou H, Jackson AO.** 1996. Expression of the barley stripe mosaic virus RNA beta "triple gene block". *Virology* **216**:367-379.
12. **Higuchi R, Krummel B, Saiki RK.** 1988. A general method of in vitro preparation and specific mutagenesis of DNA fragments: study of protein and DNA interactions. *Nucleic Acids Res.* **16**:7351-7367.
13. **Shi BJ, Ding SW, Symons RH.** 1997. Plasmid vector for cloning infectious cDNAs from plant RNA viruses: high infectivity of cDNA clones of tomato aspermy cucumovirus. *J. Gen. Virol.* **78** ( Pt 5):1181-1185.
14. **Matz MV, Fradkov AF, Labas YA, Savitsky AP, Zaraisky AG, Markelov ML, Lukyanov SA.** 1999. Fluorescent proteins from nonbioluminescent Anthozoa species. *Nat. Biotechnol.* **17**:969-973.
